# Supplementary material for: Sustainable synthesis of hollow Cu-loaded poly(m-phenylenediamine) particles and their application for arsenic removal
Source: Royal Society of Chemistry journal article supplement (doi:10.1039/c4ra16499g), 2015-01-01
Supplement: c4ra16499g1.pdf [file c4ra16499g1.pdf]

# Sustainable Synthesis of Hollow Cu-loaded Poly(*m*-phenylenediamine) particles and Their Application for Arsenic Removal

Shuo Dai,<sup>a</sup> Bing Peng<sup>a, b</sup> Liyuan Zhang,<sup>a</sup> Liyuan Chai,<sup>a, b</sup> Ting Wang,<sup>a</sup> Yun Meng,<sup>a</sup> Xiaorui Li,<sup>a</sup> Haiying Wang,<sup>\* a, b</sup> Jian Luo<sup>c</sup>

<sup>a</sup> School of Metallurgy and Environment, Central South University, Changsha 410071, China.

<sup>b</sup> National Research Centre for Heavy Metal Pollution Prevention & Control, Changsha 410017, China.

<sup>c</sup> School of Civil and Environmental Engineering, Georgia Institute of Technology, Atlanta, GA

30332-0355, United States

## Electronic Supplementary Information

|                                                                                                                                        |           |
|----------------------------------------------------------------------------------------------------------------------------------------|-----------|
| <b>ESI-1 Equipment.....</b>                                                                                                            | <b>1</b>  |
| <b>ESI-2 Synthesis sketch map.....</b>                                                                                                 | <b>3</b>  |
| <b>ESI-3 Total TOC and Cu amounts in filtrates after polymerization .....</b>                                                          | <b>4</b>  |
| <b>ESI-4 SEM and TEM images of PmPD-Cu1:1 in different time. ....</b>                                                                  | <b>5</b>  |
| <b>ESI-5 Raman spectra of PmPD particles. ....</b>                                                                                     | <b>6</b>  |
| <b>ESI-6 Parameters of Langmuir and Freundlich models simulated by liner fit for the adsorption of arsenic on PmPD particles. ....</b> | <b>7</b>  |
| <b>ESI-7 Kinetic parameters of Pseudo-first and -second models for the adsorption of arsenic on PmPD-Cu1:0.25. ....</b>                | <b>9</b>  |
| <b>ESI-8 Effect of coexisting ions on AsO<sub>4</sub><sup>3-</sup> adsorption with PmPD-Cu1:0.25. ....</b>                             | <b>10</b> |

---

\* Corresponding authors. Fax: +86-0731-88830804. Mobile: +86-13874882823. E-mail: haiyw25@yahoo.com.

## ESI-1 Equipment

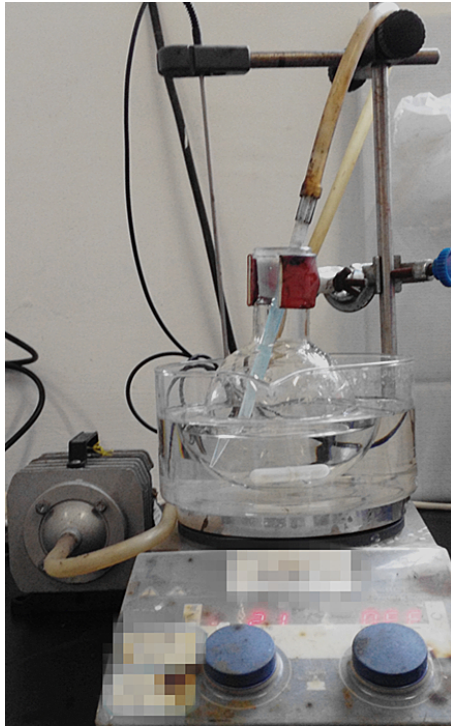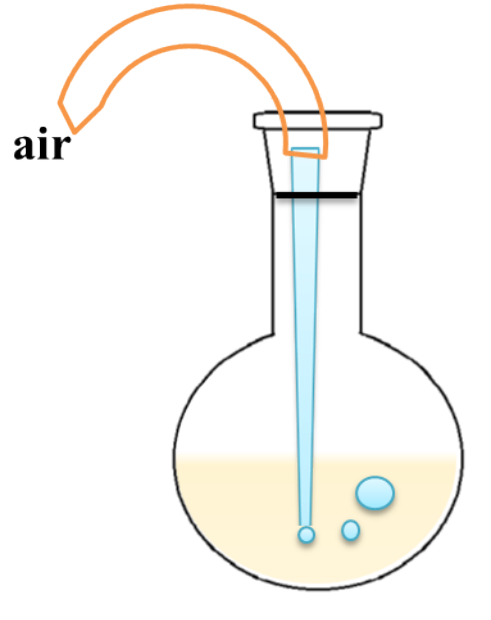

## ESI-2 Synthesis sketch map

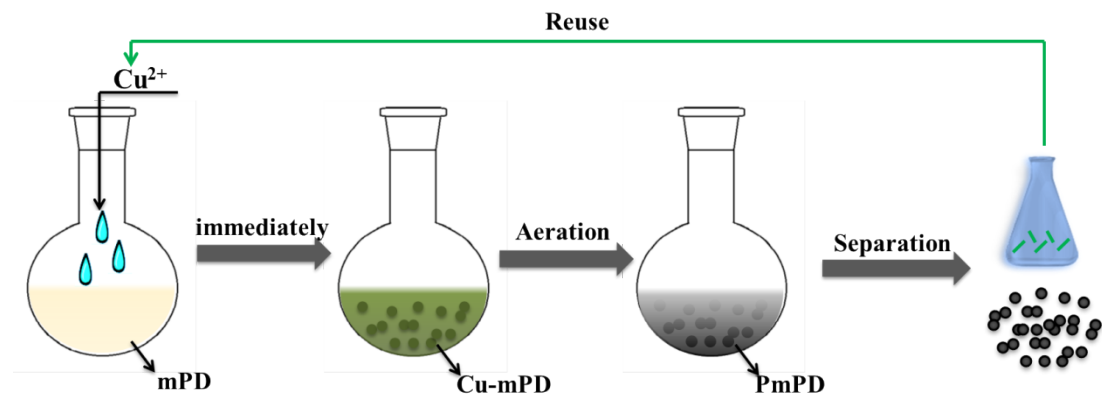

### ESI-3 Total TOC and Cu amounts in filtrates after polymerization

| PmPD-name       | TOC in filtrate (mg L <sup>-1</sup> ) | Total Cu in filtrate (mg) |
|-----------------|---------------------------------------|---------------------------|
| <i>Cu1:1</i>    | 8.7±0.4                               | 864±44                    |
| <i>Cu1:0.5</i>  | 9.65±0.6                              | 445±38                    |
| <i>Cu1:0.25</i> | 122.5±4                               | 65±2                      |

**ESI-4 SEM and TEM images of PmPD-Cu1:1 in different time.**

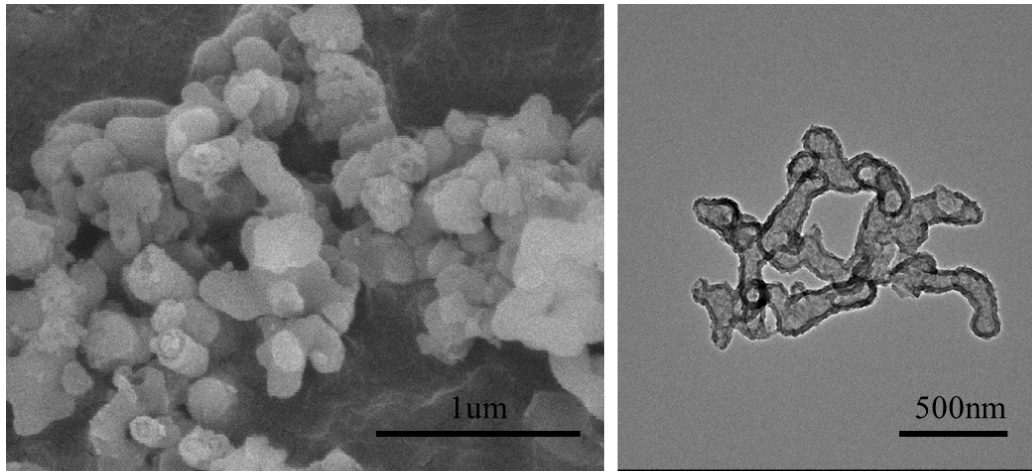

(a) PmPD-Cu1:1-before air introduction

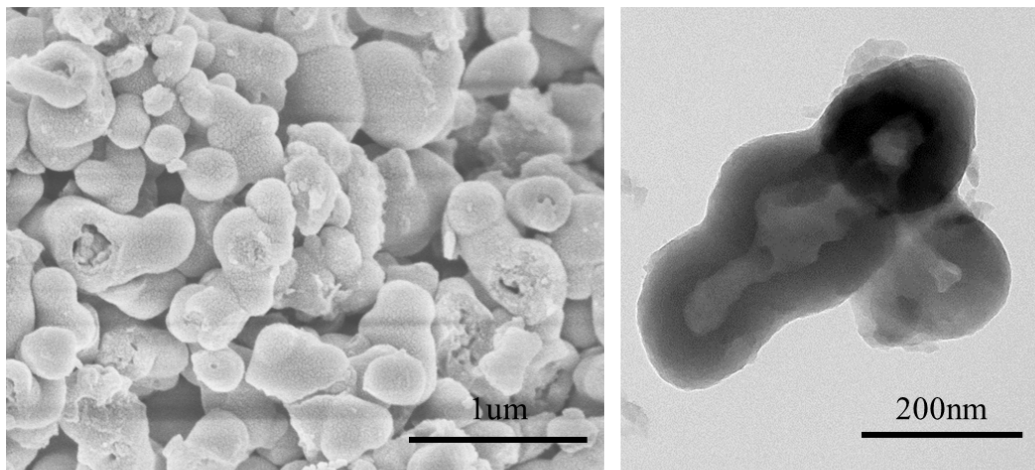

(b) PmPD-Cu1:1 -after reaction for 6h

## ESI-5 Raman spectra of PmPD particles.

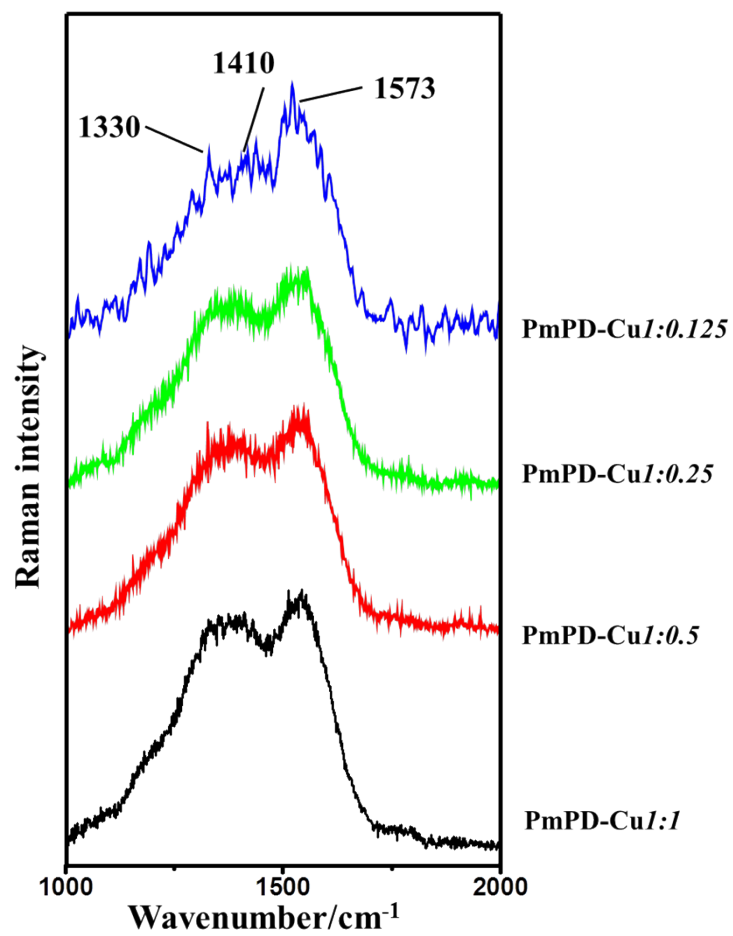

**ESI-6 Parameters of Langmuir and Freundlich models simulated by liner fit for the adsorption of arsenic on PmPD particles.**

| PmPD-name               | Langmuir model |                                    |               |
|-------------------------|----------------|------------------------------------|---------------|
|                         | $K_L$          | $Q_m(\text{mg}\cdot\text{g}^{-1})$ | $R^2$         |
| <b><i>CuI:1</i></b>     | 0.0295±0.0004  | 24.51±0.12                         | 0.9784±0.0032 |
| <b><i>CuI:0.5</i></b>   | 0.0382±0.0013  | 24.60±0.33                         | 0.9845±0.0004 |
| <b><i>CuI:0.25</i></b>  | 0.0448±0.0039  | 28.13±0.12                         | 0.9793±0.0051 |
| <b><i>CuI:0.125</i></b> | 0.0298±0.0005  | 16.63±0.10                         | 0.9853±0.0071 |
| <b><i>CuI:0.1</i></b>   | 0.0399±0.0021  | 13.12±0.19                         | 0.9897±0.0045 |
| <b><i>Cu0</i></b>       | 0.0089±0.0011  | 11.24±0.69                         | 0.9913±0.0001 |

  

| PmPD-name               | Freundlich model |                 |                 |
|-------------------------|------------------|-----------------|-----------------|
|                         | $K_F$            | 1/n             | $R^2$           |
| <b><i>CuI:1</i></b>     | 3.0191 ± 0.0719  | 0.3613 ± 0.0068 | 0.9962 ± 0.0008 |
| <b><i>CuI:0.5</i></b>   | 3.8971 ± 0.3005  | 0.3216 ± 0.0122 | 0.9956 ± 0.0015 |
| <b><i>CuI:0.25</i></b>  | 5.9635 ± 0.0027  | 0.2699 ± 0.0002 | 0.9951 ± 0.0026 |
| <b><i>CuI:0.125</i></b> | 2.0266 ± 0.0487  | 0.4009 ± 0.0119 | 0.9896 ± 0.0051 |
| <b><i>CuI:0.1</i></b>   | 1.7481 ± 0.0569  | 0.3334 ± 0.0090 | 0.9888 ± 0.0041 |
| <b><i>Cu0</i></b>       | 0.1030 ± 0.0162  | 0.8142 ± 0.0420 | 0.9563 ± 0.0048 |

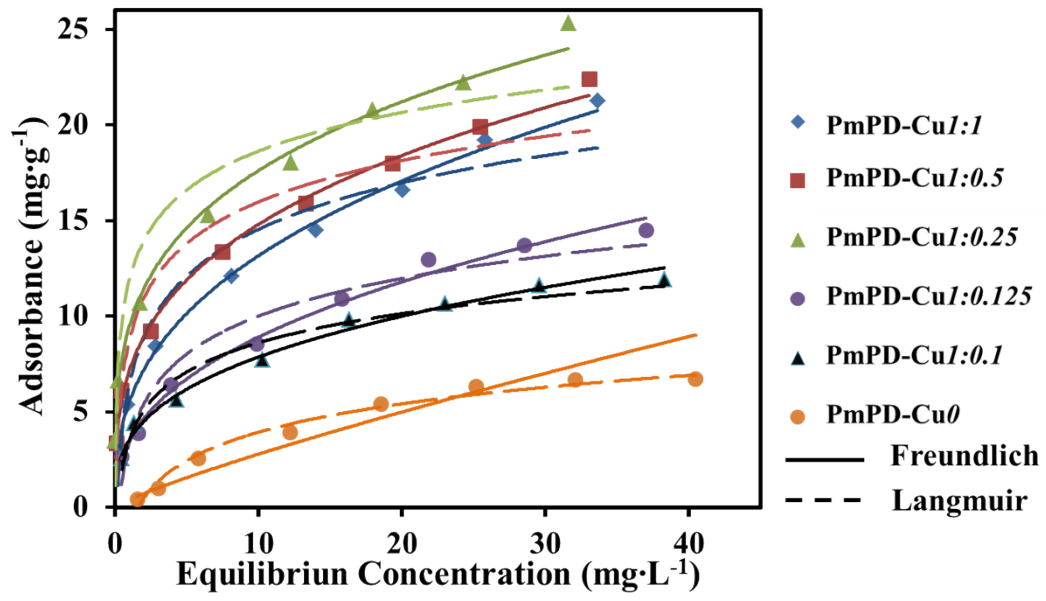



**ESI-7 Kinetic parameters of Pseudo-first and -second models for the adsorption of arsenic on PmPD-Cu1:0.25.**

| <b>PmPD-name</b>                 |                                           | <b>Cu1:0.25</b>       |
|----------------------------------|-------------------------------------------|-----------------------|
|                                  | $Q_{e,exp}$                               | $6.55 \pm 0.19$       |
| <b>Pseudo-first-order model</b>  | $k(\text{min}^{-1})$                      | $0.00058 \pm 0.00012$ |
|                                  | $Q_{e,cal} (\text{mg}\cdot\text{g}^{-1})$ | $1.247 \pm 0.029$     |
|                                  | $R^2$                                     | $0.8662 \pm 0.1037$   |
| <b>Pseudo-second-order model</b> | $h(\text{min}^{-1})$                      | $2.522 \pm 0.538$     |
|                                  | $Q_{e,cal} (\text{mg}\cdot\text{g}^{-1})$ | $6.081 \pm 0.0278$    |
|                                  | $R^2$                                     | $0.99996 \pm 0.00003$ |

**ESI-8 Effect of coexisting ions on  $\text{AsO}_4^{3-}$  adsorption with PmPD-Cu1:0.25.**

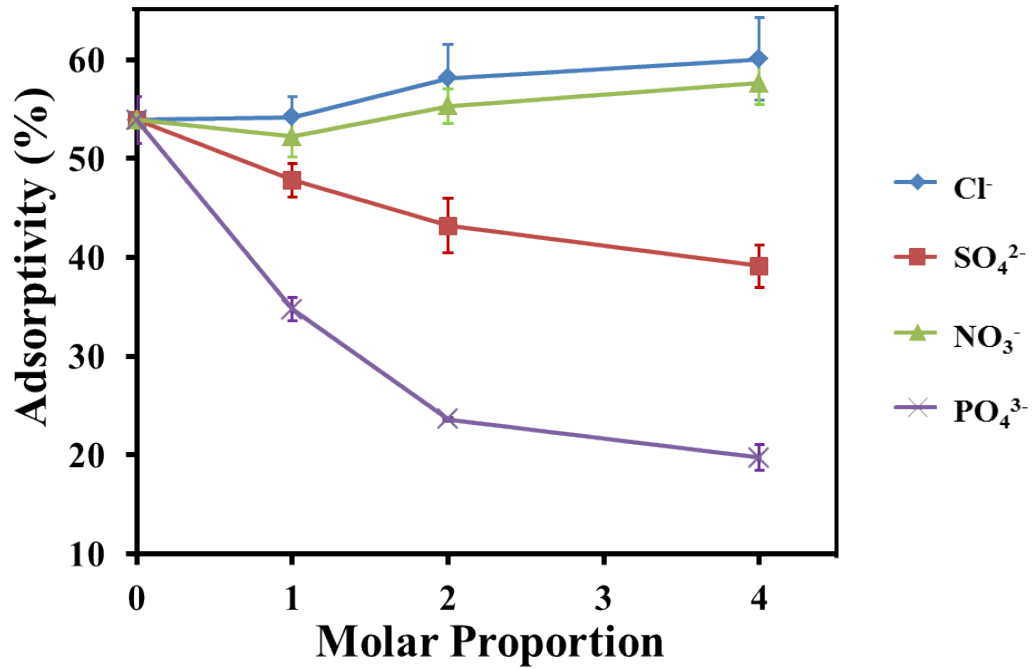

**Molar Proportion** is the molar proportion of competing anions to  $\text{AsO}_4^{3-}$  (from 1:1 to 4:1).
